# Supplementary material for: Thunderstorm Asthma Epidemic—A Systematic Review of the General Practice Perspective
Source: PubMed Central journal article supplement (PMC7312025; doi:10.3390/ijerph17113796), 2020-05-27
Supplement: ijerph-17-03796-s001.pdf [file ijerph-17-03796-s001.pdf]

Review

# Thunderstorm Asthma Epidemic—A Systematic Review of the General Practice Perspective

Ambereen Farouque <sup>1</sup>, Rae Walker <sup>1</sup> and Bircan Erbas <sup>1,2,\*</sup>

<sup>1</sup> Department of Public Health, School of Psychology and Public Health, La Trobe University, Bundoora, VIC 3086, Australia; amber.farouque@gmail.com (A.F.); r.walker@latrobe.edu.au (R.W.)

<sup>2</sup> Faculty of Public Health, Universitas Airlangga, Surabaya 60115, Indonesia

\* Correspondence: B.Erbas@latrobe.edu.au; Tel.: +61-39-479-5657 or +61-39-479-1783

Received: 30 March 2020; Accepted: 25 May 2020; Published: 27 May 2020

Online Supplementary Figure 1.S: Database(s): Ovid MEDLINE(R) ALL 1946 to November 27, 2019

Search Strategy:

| #  | Searches                                                                                                                                                                                                                                                                                                                                               | Results |
|----|--------------------------------------------------------------------------------------------------------------------------------------------------------------------------------------------------------------------------------------------------------------------------------------------------------------------------------------------------------|---------|
| 1  | thunderstorm asthma.mp.                                                                                                                                                                                                                                                                                                                                | 57      |
| 2  | General Practice/ or Family Practice/                                                                                                                                                                                                                                                                                                                  | 74072   |
| 3  | 1 and 2                                                                                                                                                                                                                                                                                                                                                | 1       |
| 4  | (Primary Health Care or Family Practice or Nurse Practitioner).mp. [mp=title, abstract, original title, name of substance word, subject heading word, floating sub-heading word, keyword heading word, organism supplementary concept word, protocol supplementary concept word, rare disease supplementary concept word, unique identifier, synonyms] | 154338  |
| 5  | 1 and 4                                                                                                                                                                                                                                                                                                                                                | 0       |
| 6  | hospital resource management.mp.                                                                                                                                                                                                                                                                                                                       | 5       |
| 7  | 1 and 6                                                                                                                                                                                                                                                                                                                                                | 0       |
| 8  | disaster management, public health emergency, public health disaster, disaster.mp.                                                                                                                                                                                                                                                                     | 0       |
| 9  | 2 and 4 and 8                                                                                                                                                                                                                                                                                                                                          | 0       |
| 10 | 2 and 4                                                                                                                                                                                                                                                                                                                                                | 66218   |
| 11 | pandemic influenza, respiratory pandemics,.mp. or Pandemics/                                                                                                                                                                                                                                                                                           | 4786    |

|    |                                    |      |
|----|------------------------------------|------|
| 12 | 10 and 11                          | 5    |
| 13 | forest fire, industrial fires,.mp. | 0    |
| 14 | heatwaves.mp.                      | 312  |
| 15 | 10 and 14                          | 0    |
| 16 | hurricane.mp. or Cyclonic Storms/  | 3808 |
| 17 | 10 and 16                          | 6    |
| 18 | Floods/ or flooding.mp.            | 7589 |
| 19 | 10 and 18                          | 1    |

Online Supplementary Table S.1: Data analysis and themes

| Themes                                                    | Sub-theme                                                            | Possible solution/outcome/experience                                                                                                                                                                                                                                                                                    |
|-----------------------------------------------------------|----------------------------------------------------------------------|-------------------------------------------------------------------------------------------------------------------------------------------------------------------------------------------------------------------------------------------------------------------------------------------------------------------------|
| Limited resources                                         | Equipment                                                            | Rationing equipment<br>Recycling equipment                                                                                                                                                                                                                                                                              |
|                                                           | Personnel                                                            | Stop unnecessary procedures and processes<br>Additional staffing<br>Altered staff roles<br>Triage<br>Developing criteria for treatment                                                                                                                                                                                  |
|                                                           | Space                                                                | Use of non-traditional triage spaces<br>Multiple patients to a single treatment room<br>Telephone advice facilities<br>Majority of patients can safely be sent home after a course of treatment.                                                                                                                        |
|                                                           | Time                                                                 | Altered working hours and shifts                                                                                                                                                                                                                                                                                        |
| Increased use of GP services in a public health emergency | Increase in GP consultations during TA epidemic                      | Role of primary healthcare system during exceptional circumstances is not clearly defined or comprehensively studied<br>Almost no literature on the role of general practitioners in caring for disaster victims.<br>Lack of bulk billing (free treatment) can deter people from visiting their GP during an emergency. |
|                                                           | Increase in after-hours GP consultations observed during TA epidemic | Increased demand on general practice after-hours services as regular practices were closed                                                                                                                                                                                                                              |
| Willingness of GP's to provide care                       | Barriers to providing care                                           | Staff illness.<br>Consequences of school and childcare closure on staffing.<br>Preparedness of general practice clinics perceived as inadequate by GP's<br>GP's uniquely placed to identify vulnerable patients.                                                                                                        |
|                                                           | Facilitators to providing care                                       | Willingness of general practice services to provide care<br>Majority of patients could safely be sent home after a course of treatment and majority of asthma management is within the skill set of general practice staff.                                                                                             |

|               |                                                                                            |                                                                                                                                                                                                                                                                                                                                                                                                                                                                                                                                                      |
|---------------|--------------------------------------------------------------------------------------------|------------------------------------------------------------------------------------------------------------------------------------------------------------------------------------------------------------------------------------------------------------------------------------------------------------------------------------------------------------------------------------------------------------------------------------------------------------------------------------------------------------------------------------------------------|
|               | GPs and PNs have the breadth of knowledge, skills and established community/patient links. | GPs and PNs can provide emotional care/patient education/ provide long term care to communities after disaster<br>Nursing roles including a psychosocial supporter, a coordinator of care and resources, and problem solvers                                                                                                                                                                                                                                                                                                                         |
| Communication | Facilitators that enhance surge capacity during emergencies                                | Majority of GPs support response measure: e-mail, fax notices on public health efforts and a hot-line for physicians, clinical recommendations, internet bulletin boards and discussion groups. GPs enthusiastic about receiving further information and training in pandemic preparedness. Public health messages important<br>Agreed communication platforms, channels and protocols exist and are understood and used during emergencies<br>Improve instruction about the event resulting in greater preparedness and a more coordinated response |
|               | Barriers to increasing surge capacity                                                      | Divisions of general practice have a pivotal role to play in disaster plans<br>GP perceive information dissemination efforts from local health departments during respiratory surge events are deficient<br>Very little public health structures in place for GP or PN recruitment into public health emergency response teams.                                                                                                                                                                                                                      |
| Co-ordination | Facilitators that enhance surge capacity during emergencies                                | Appropriate personnel are involved and informed during emergencies.<br>Planning between Department of Health and Human Services and general practices, to ensure a better utilisation of medical expertise.                                                                                                                                                                                                                                                                                                                                          |
|               | Barriers to increasing surge capacity                                                      | Very little mention of the role of general practice services.<br>General practitioner services are rarely mentioned in medical disaster plans                                                                                                                                                                                                                                                                                                                                                                                                        |

Online Supplementary Table S.2.: Grey literature appraisal- Public Health Ontario Guide to appraising grey literature

| Title & [Ref. no.]                                          | <b>Author/Publisher</b><br><b>Validity Questions:</b><br>Is the information shared for commercial purposes?<br>Does the site sponsor have a political or philosophical agenda? | <b>Host/Sponsor</b><br><b>Validity Questions:</b><br>Does the author/host have an agenda?<br>Publishing body: Are they a well-known provincial/national government-affiliated public health agency, for-profit company. Political or philosophical agenda? | <b>Facts/References</b><br><b>Validity Questions:</b><br>Are references to research evidence?<br>Is the information based on research/data/analysis or is it opinion piece?<br>Can you verify some cited sources, facts?<br>How current are the references? | <b>Currency</b><br><b>Validity</b><br><b>Questions:</b><br>Publication date?<br>Is the information current? | <b>Overall</b><br><b>Validity</b> |
|-------------------------------------------------------------|--------------------------------------------------------------------------------------------------------------------------------------------------------------------------------|------------------------------------------------------------------------------------------------------------------------------------------------------------------------------------------------------------------------------------------------------------|-------------------------------------------------------------------------------------------------------------------------------------------------------------------------------------------------------------------------------------------------------------|-------------------------------------------------------------------------------------------------------------|-----------------------------------|
| Hazelwood Mine Fire enquiry [4]                             | Victorian Government autonomous body with independent authorship panel, expert evidence, testimonies and independent investigators.                                            | Victorian Government, agenda is to produce an independent National Government enquiry into the Hazelwood Mine Fire.                                                                                                                                        | References all based on direct investigation, analysis or research evidence.<br>All sources can be verified.<br>References current                                                                                                                          | 2016                                                                                                        | High                              |
| Victorian Bushfires Royal Commission [5]                    | Victorian Government autonomous body with independent authorship panel, expert evidence, testimonies and independent investigators.                                            | Victorian Government, agenda is to produce an independent National Government enquiry into the Victorian bushfires                                                                                                                                         | References all based on direct investigation, analysis or research evidence.<br>All sources can be verified.<br>References current                                                                                                                          | 2009                                                                                                        | High                              |
| Rural Communities and Disaster Recovery: Position Paper [1] | National Rural Health Alliance including; The Royal Australian College of General Practitioners: multiple authors, Sponsors support rural communities' health.                 | Multiple Rural Health Stakeholder Sponsors represent health consumers, health care professionals, and service providers including the RACGP; Political agenda is to lobby government in support of rural health priorities.                                | References current and some based on stakeholder data.<br>Majority of sources cited or government references                                                                                                                                                | 2004                                                                                                        | High                              |

|                                                                                                 |                                                  |                                                                                                                                               |                                                                                                                                                                                                                   |      |      |
|-------------------------------------------------------------------------------------------------|--------------------------------------------------|-----------------------------------------------------------------------------------------------------------------------------------------------|-------------------------------------------------------------------------------------------------------------------------------------------------------------------------------------------------------------------|------|------|
| Review of Australia's health sector response to pandemic (H1N1) 2009: lessons identified." [12] | Dept. of Health and Ageing, Canberra, Australia. | National Government Departmental Review: agenda is to produce an account and analysis of the pandemic 2009. Multiple stakeholder consultation | References all based on departmental data sources, direct investigation, analysis or research evidence. Majority of sources cited government references or data. All external sources can be verified and current | 2011 | High |
|-------------------------------------------------------------------------------------------------|--------------------------------------------------|-----------------------------------------------------------------------------------------------------------------------------------------------|-------------------------------------------------------------------------------------------------------------------------------------------------------------------------------------------------------------------|------|------|

Online Supplementary Table S.3: Quantitative, qualitative and mixed methods article appraisal - Public Health Ontario MetaQAT (quality appraisal tool)

| Ref ID | Publication Year | Citation                                                                                                                                                                                                                                                                                            | Validity                         |
|--------|------------------|-----------------------------------------------------------------------------------------------------------------------------------------------------------------------------------------------------------------------------------------------------------------------------------------------------|----------------------------------|
| [2]    | 2006             | Hogg, W., et al. (2006). "Enhancing public health response to respiratory epidemics: are family physicians ready and willing to help?" <i>Canadian Family Physician</i> 52(10): 1254-1260.                                                                                                          | Overall appraisal 13/13, High    |
| [14]   | 1999             | Hajat, S., et al. "Association of air pollution with daily GP consultations for asthma and other lower respiratory conditions in London." <i>Thorax</i> 54(7): 597-605.                                                                                                                             | Overall appraisal 12/13, High    |
| [15]   | 1997             | Higham, J., et al. "Asthma and thunderstorms: Description of an epidemic in general practice in Britain using data from a doctor's deputising service in the UK." <i>Journal of Epidemiology and Community Health</i> 51(3): 233-238.                                                               | Overall appraisal is 12/13, High |
| [13]   | 1996             | Davidson, A. C., et al. "A major outbreak of asthma associated with a thunderstorm: experience of accident and emergency departments and patients' characteristics. (Thames Regions Accident and Emergency Trainees Association)." <i>British Medical Journal</i> 312(7031): 601.                   | Overall appraisal is 11/13, High |
| [3]    | 2012             | Ranse, J., & Lenson, S. (2012). Beyond a clinical role: nurses were psychosocial supporters, coordinators and problem solvers in the Black Saturday and Victorian bushfires in 2009. <i>Australasian emergency nursing journal</i> , 15(3), 156-163.                                                | Overall appraisal is 7/13, Low   |
| [6]    | 2003             | Robinson, M. (2003). Bushfires, 2003: a rural GP's perspective. <i>Australian Family Physician</i> , 32(12), 985-988.                                                                                                                                                                               | Overall appraisal is 7/13, Low   |
| [7]    | 2007             | Edwards, T. D., Young, R. A., & Lowe, A. F. (2007). Caring for a surge of Hurricane Katrina evacuees in primary care clinics. <i>The Annals of Family Medicine</i> , 5(2), 170-174.                                                                                                                 | Overall appraisal is 7/13, Low   |
| [8]    | 2009             | Pitts, J., Lynch, M., Mulholland, M., Curtis, A., Simpson, J., & Meacham, J. (2009). Disaster planning: using an 'evolving scenario' approach for pandemic influenza with primary care doctors in training. <i>Education for Primary Care</i> , 20(5), 346-352.                                     | Overall appraisal is 10/13, High |
| [9]    | 2009             | Dearinger, A. T., Howard, A., Ingram, R., Wilding, S., Scutchfield, D., Pearce, K. A., & Hall, B. (2011). Communication efforts among local health departments and health care professionals during the 2009 H1N1 outbreak. <i>Journal of Public Health Management and Practice</i> , 17(1), 45-51. | Overall appraisal is 9/13, High  |

|      |      |                                                                                                                                                                                                                                                       |                                  |
|------|------|-------------------------------------------------------------------------------------------------------------------------------------------------------------------------------------------------------------------------------------------------------|----------------------------------|
| [10] | 2006 | Shaw, K. A., Chilcott, A., Hansen, E., & Winzenberg, T. (2006). The GP's response to pandemic influenza: a qualitative study. <i>Family Practice</i> , 23(3), 267-272.                                                                                | Overall appraisal is 12/13, High |
| [11] | 2014 | Johal, S., Mounsey, Z., Tuohy, R., & Johnston, D. (2014). Coping with disaster: General practitioners' perspectives on the impact of the Canterbury earthquakes. <i>PLoS currents</i> , 6.                                                            | Overall appraisal is 11/13, High |
| [16] | 2017 | Andrew, E., Nehme, Z., Bernard, S., Abramson, M. J., Newbigin, E., Piper, B., ... & Smith, K. (2017). Stormy weather: a retrospective analysis of demand for emergency medical services during epidemic thunderstorm asthma. <i>bmj</i> , 359, j5636. | Overall appraisal is 9/13, High  |
